# Supplementary material for: In-Cell Intrabody Selection from a Diverse Human Library Identifies C12orf4 Protein as a New Player in Rodent Mast Cell Degranulation
Source: PubMed Central journal article supplement (PMC4133367; doi:10.1371/journal.pone.0104998), 2014-08-14
Supplement: pone.0104998.s003.pdf [file pone.0104998.s003.pdf]

a

**VH**

| <b>Library</b> | <b>Nb of reads</b> | <b>Nb of seq<br/>(dna)</b> | <b>Nb of seq<br/>(dna no stop)</b> | <b>Nb of seq<br/>(aa)</b> |
|----------------|--------------------|----------------------------|------------------------------------|---------------------------|
| Naive          | 10,962,195         | 456,029                    | 363,616                            | 244,467                   |
| Round 3a       | 1,090,966          | 32,079                     | 26,655                             | 20,194                    |
| Round 3        | 531,669            | 62,186                     | 49,113                             | 36,933                    |
| Round 5        | 834,599            | 38,500                     | 29,266                             | 21,592                    |
| Round 7        | 792,281            | 33,375                     | 25,463                             | 18,930                    |
| Round 8        | 787,691            | 35,793                     | 27,092                             | 20,223                    |

b

**VL**

| <b>Library</b> | <b>Nb of reads</b> | <b>Nb of seq<br/>(dna)</b> | <b>Nb of seq<br/>(dna no stop)</b> | <b>Nb of seq<br/>(aa)</b> |
|----------------|--------------------|----------------------------|------------------------------------|---------------------------|
| Naive          | 11,009,067         | 600,748                    | 519,580                            | 357,942                   |
| Round 3a       | 914,090            | 39,354                     | 35,675                             | 29,944                    |
| Round 3        | 563,580            | 74,572                     | 67,506                             | 54,876                    |
| Round 5        | 872,121            | 51,661                     | 45,236                             | 35,265                    |
| Round 7        | 824,388            | 52,565                     | 45,893                             | 35,743                    |
| Round 8        | 827,303            | 53,787                     | 46,870                             | 36,687                    |
