# Supplementary material for: In-Cell Intrabody Selection from a Diverse Human Library Identifies C12orf4 Protein as a New Player in Rodent Mast Cell Degranulation
Source: PubMed Central journal article supplement (PMC4133367; doi:10.1371/journal.pone.0104998), 2014-08-14

Distance

0.0 0.2 0.4 0.6 0.8 1.0

Family 1

Family 2  
Family 3

Family 4  
Family 5

Family 6

Family 7

Family 8

Family 9

Family 10

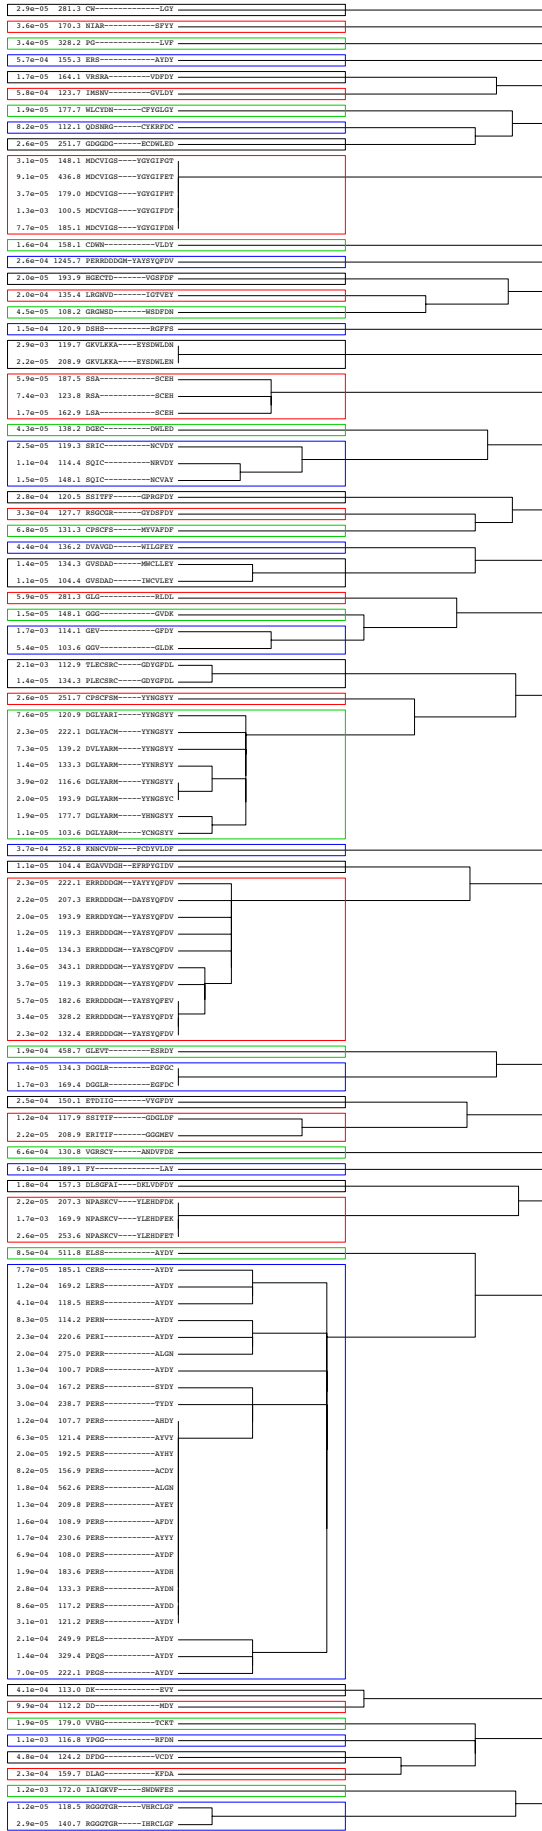

Supplement: pone.0104998.s004.pdf [file pone.0104998.s004.pdf]
