# Supplementary material for: In-Cell Intrabody Selection from a Diverse Human Library Identifies C12orf4 Protein as a New Player in Rodent Mast Cell Degranulation
Source: PubMed Central journal article supplement (PMC4133367; doi:10.1371/journal.pone.0104998), 2014-08-14

**Family 1**  
MDCVIGSYGYGIFDT

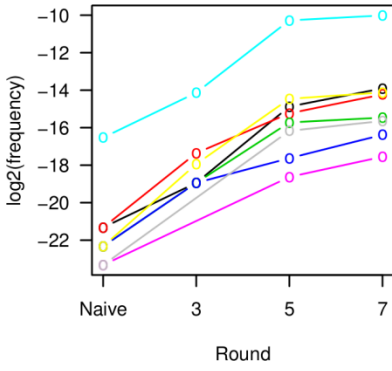

**Family 2**  
GKVLKKAEYSDWLDN

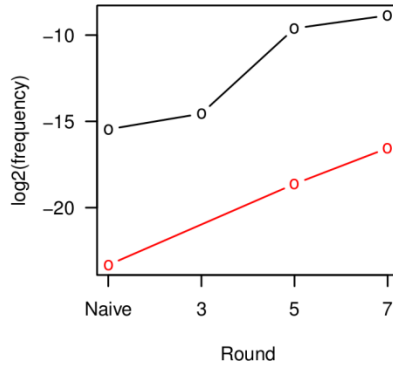

**Family 3**  
RSASCEH

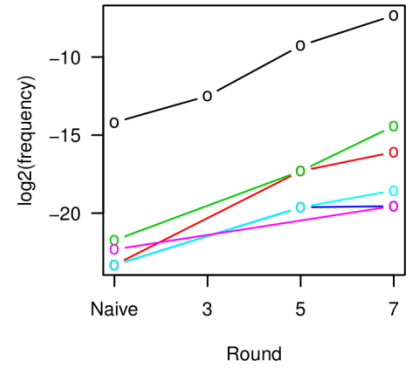

**Family 4**  
GEVGFDY

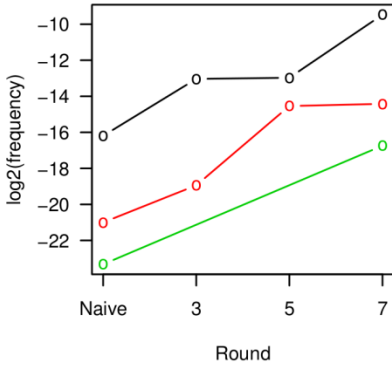

**Family 5**  
TLECSRCDYGFDL

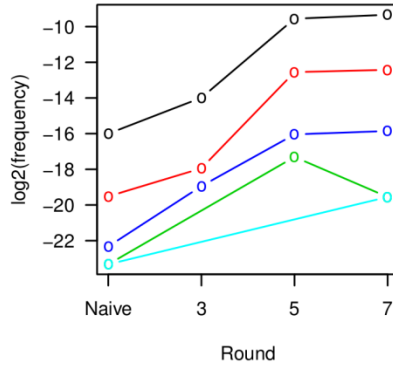

**Family 6**  
DGLYARMYYNGSYY

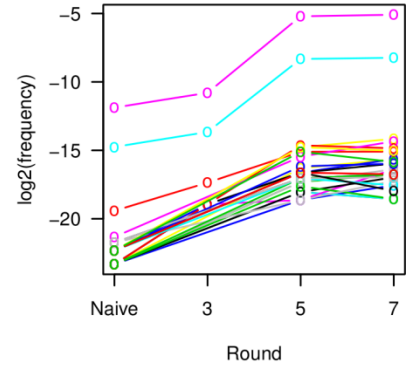

**Family 7**  
ERRDDGMYAYSQFDV

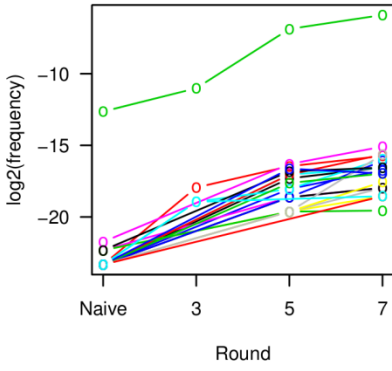

**Family 8**  
DGGLEGFDC

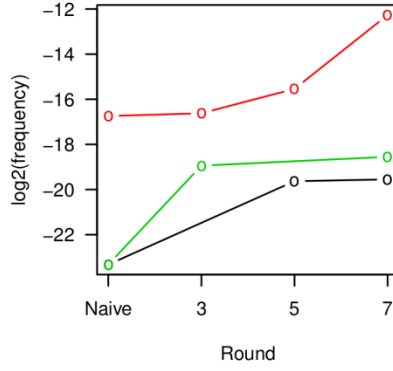

**Family 9**  
NPASKCVYLEHDFEK

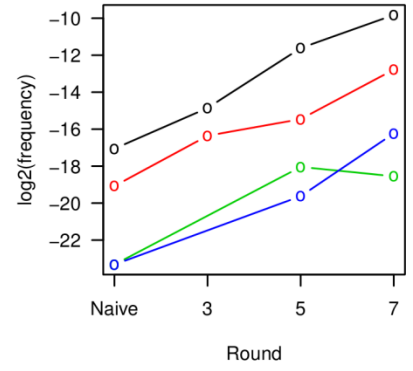

**Family 10**  
PERSAYDY

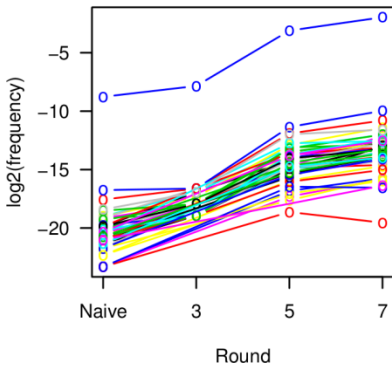

Supplement: pone.0104998.s005.pdf [file pone.0104998.s005.pdf]
