# Supplementary material for: In-Cell Intrabody Selection from a Diverse Human Library Identifies C12orf4 Protein as a New Player in Rodent Mast Cell Degranulation
Source: PubMed Central journal article supplement (PMC4133367; doi:10.1371/journal.pone.0104998), 2014-08-14
Supplement: pone.0104998.s006.pdf [file pone.0104998.s006.pdf]

---

| <b>Clone</b> | <b>VH CDR3</b>   | <b>VL CDR3</b> |
|--------------|------------------|----------------|
| R_1          | MDCVIGSYGYGIFDT  | QSFVRNSTS      |
| R_2          | GKVLKKAEYSDWLDN  | QQCSKFPLT      |
| R_3          | RSASCEH          | EQYDTAPPYT     |
| R_4          | GEVGFDY          | QQYFSQPFT      |
| R_5          | TLECSRCGDYGFDL   | HQSNTYPFT      |
| R_6          | DGLYARMYYNGSYY   | QQYFSQPFT      |
| R_7          | ERRDDDGMAYSYQFDV | Q*             |
| R_8          | DGGLREGFDC       |                |
| R_9          | NPASKCVYLEHDFEK  | QTCNCLTLV      |
| R_10         | PERSAYDY         | QQYSSHPLT      |

---
