# Supplementary material for: In-Cell Intrabody Selection from a Diverse Human Library Identifies C12orf4 Protein as a New Player in Rodent Mast Cell Degranulation
Source: PubMed Central journal article supplement (PMC4133367; doi:10.1371/journal.pone.0104998), 2014-08-14

a

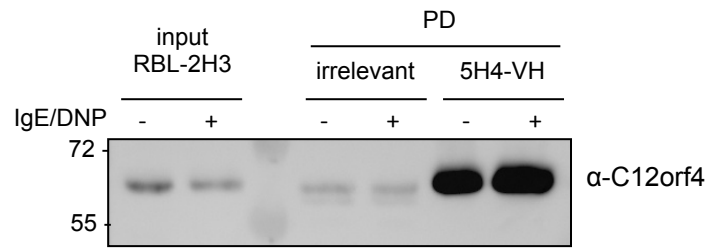

b

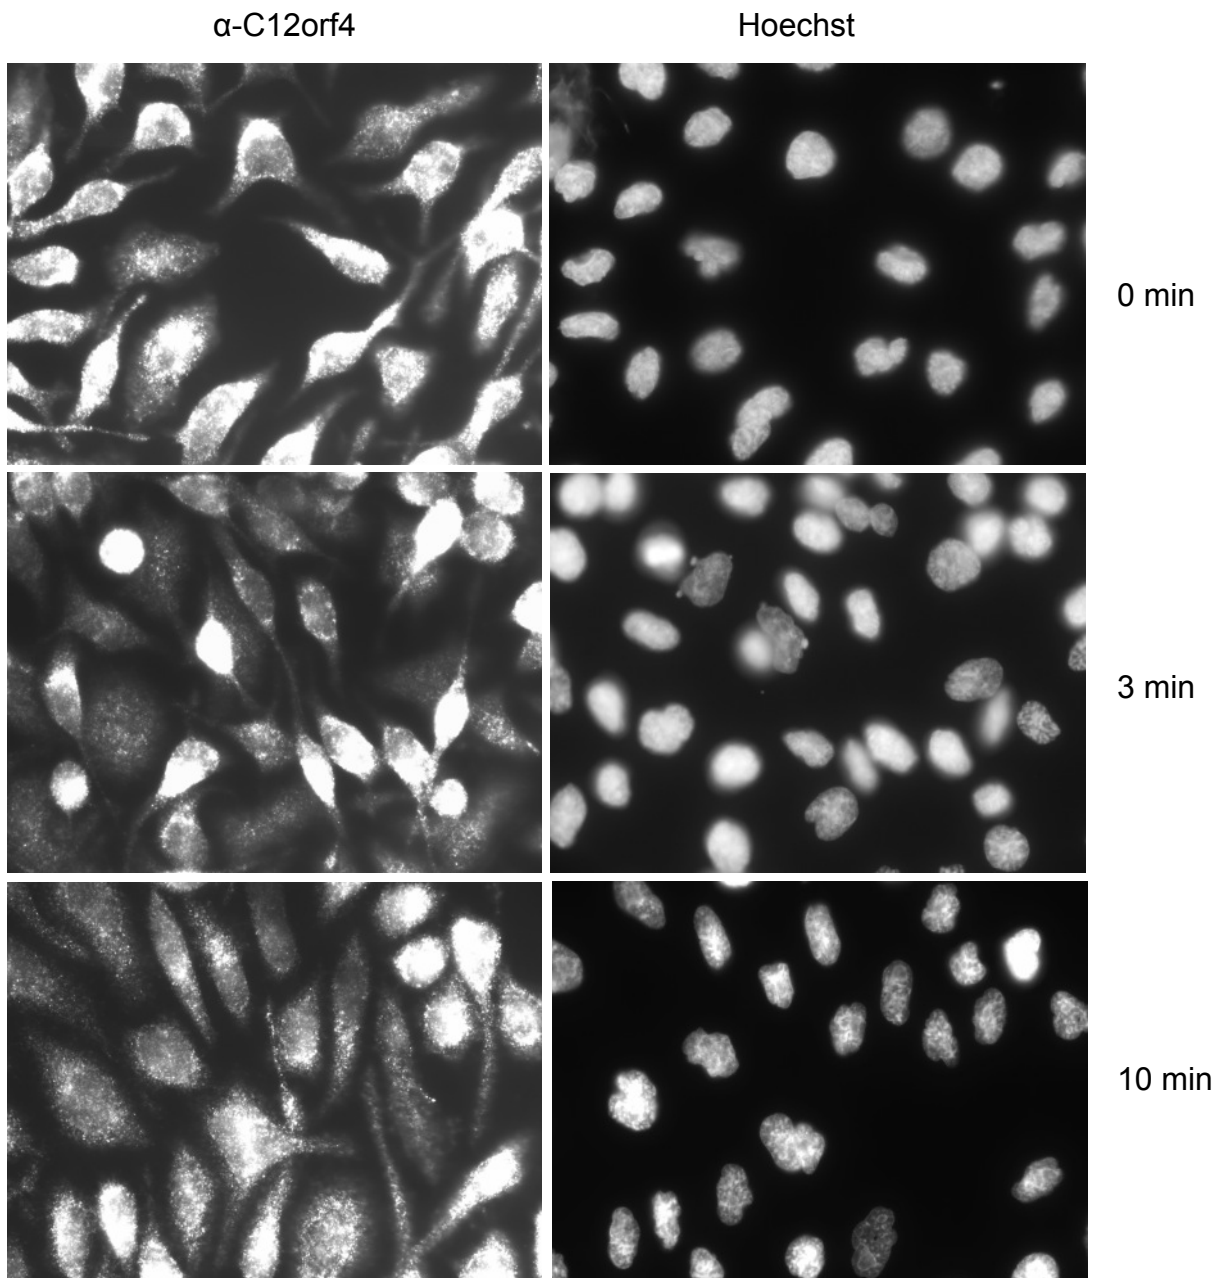

Supplement: pone.0104998.s007.pdf [file pone.0104998.s007.pdf]
