# Supplementary material for: In-Cell Intrabody Selection from a Diverse Human Library Identifies C12orf4 Protein as a New Player in Rodent Mast Cell Degranulation
Source: PubMed Central journal article supplement (PMC4133367; doi:10.1371/journal.pone.0104998), 2014-08-14

**a**

sh1 CATTCTAATCTCTCGGAAA  
 sh2 AGAATTGATTGGCGAAAGA

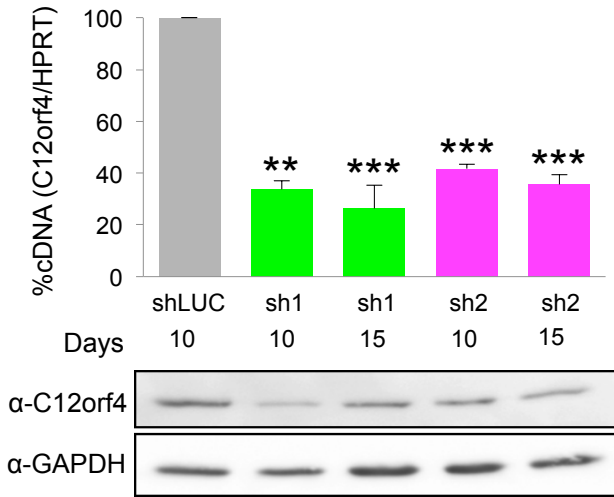**C**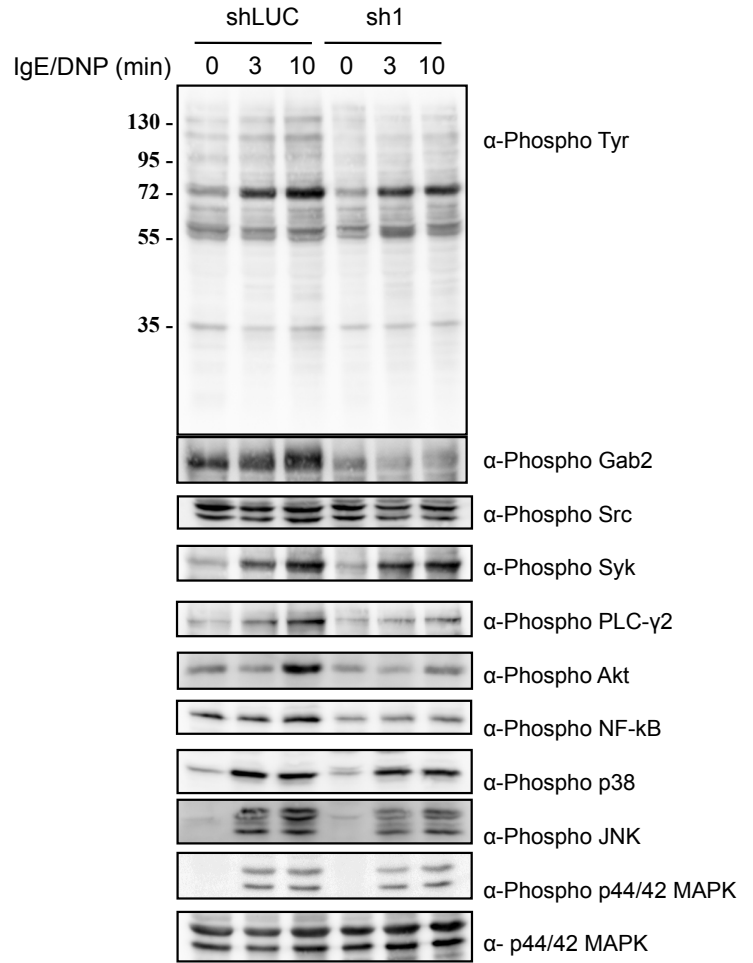**b**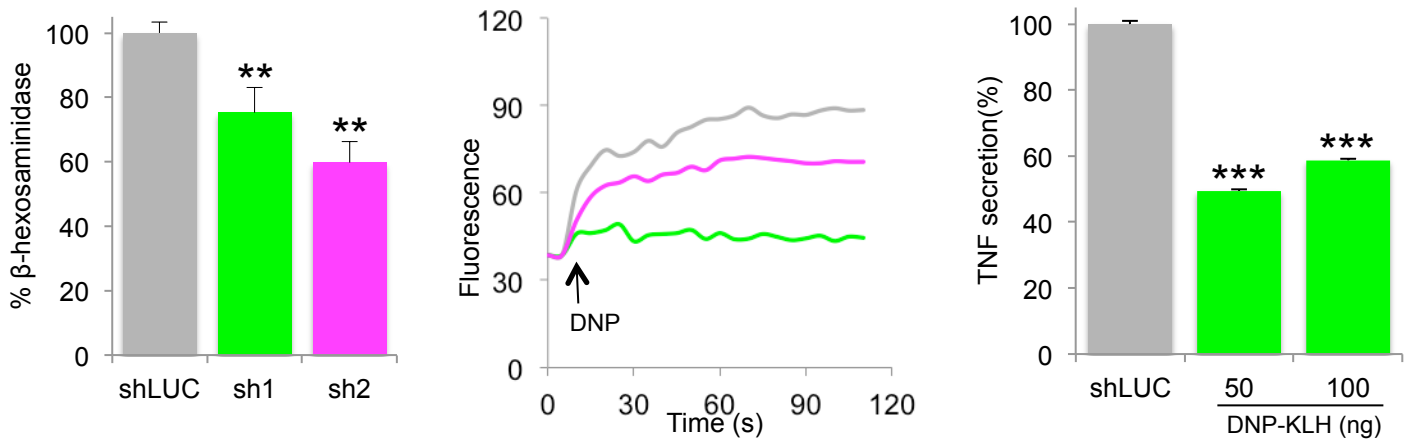

Supplement: pone.0104998.s008.pdf [file pone.0104998.s008.pdf]
